# Supplementary material for: Polymer-Coated Nanoparticles for Therapeutic and Diagnostic Non-10B Enriched Polymer-Coated Boron Carbon Oxynitride (BCNO) Nanoparticles as Potent BNCT Drug
Source: MDPI journal article supplement (doi:10.3390/nano11112936), 2021-11-02

# Polymer-Coated Nanoparticles for Therapeutic and Diagnostic

## Non-<sup>10</sup>B Enriched Polymer-Coated Boron Carbon Oxynitride (BCNO) Nanoparticles as Potent BNCT Drug

Chen-Wei Chiang<sup>1</sup>, Yun-Chen Chien<sup>1</sup>, Wen-Jui Yu<sup>2</sup>, Chia-Yu Ho<sup>1</sup>, Chih-Yi Wang<sup>1</sup>, Tzu-Wei Wang<sup>1</sup>, Chi-Shiun Chiang<sup>2</sup> and Pei-Yuin Keng<sup>1,\*</sup>

### Supporting Information

Figure S1: XRD pattern of the as prepared BCNO displaying a broad peak ca. 26.6° and another broad peak at 43.1°, which represents the (002) plane reflection of hexagonal boron nitride(h-BN) and the unresolved reflection planes of h-BN, respectively.

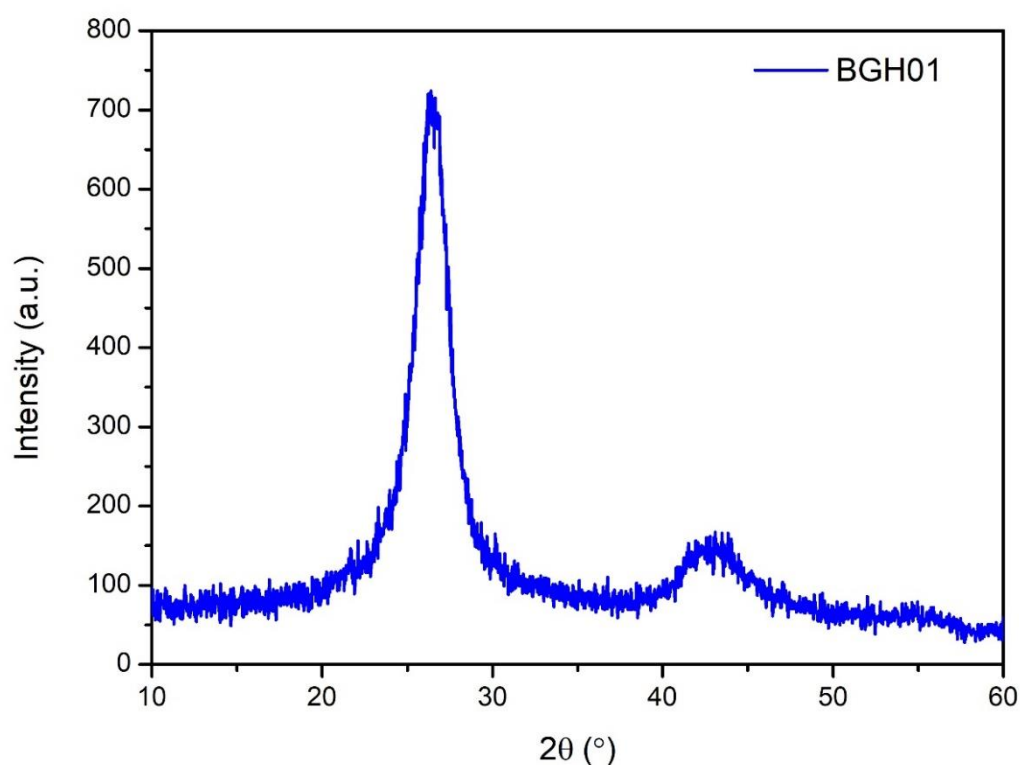

Supplement: s1 [file s1]
